# Supplementary material for: Nanopore long-read RNAseq reveals widespread transcriptional variation among the surface receptors of individual B cells
Source: PubMed Central journal article supplement (PMC5524981; doi:10.1038/ncomms16027), 2017-07-19
Supplement: ncomms16027-s1.pdf [file ncomms16027-s1.pdf]

File name: Supplementary Information

Description: Supplementary figures and supplementary tables.

File name: Peer review file

Description:

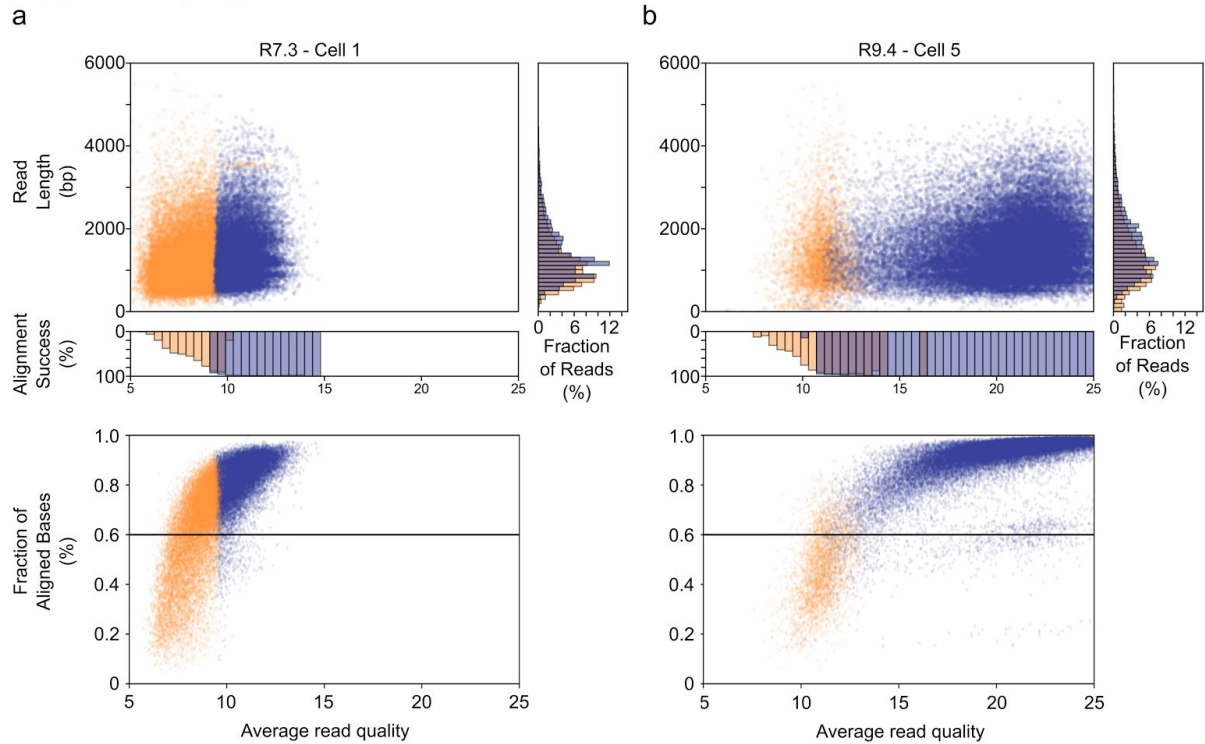

### Supplementary Fig. 1: Sequencing run characteristics

The scatter plots on top shows read length and average sequence quality for ONT 2D reads that passed (blue) or failed (orange) the Metrichor analysis pipeline quality threshold in individual R7.3 (left) and R9.4 (right) sequencing runs. The histograms on the right of the scatter plots show the reads binned by read length using the same colors as the plot in the center to indicate passed (blue) or failed (orange). Using the same color scheme, the histogram at the bottom shows alignment success (percent of reads successfully aligned by BLAT) for reads binned by sequence quality score.

The scatter plot on the bottom shows ONT 2D reads successfully aligned by BLAT. The ratio of aligned/total bases of each read (blue=pass, orange=fail) plotted against average sequence quality score. The alignment quality cut-off of 60% aligned bases is shown as a black line.

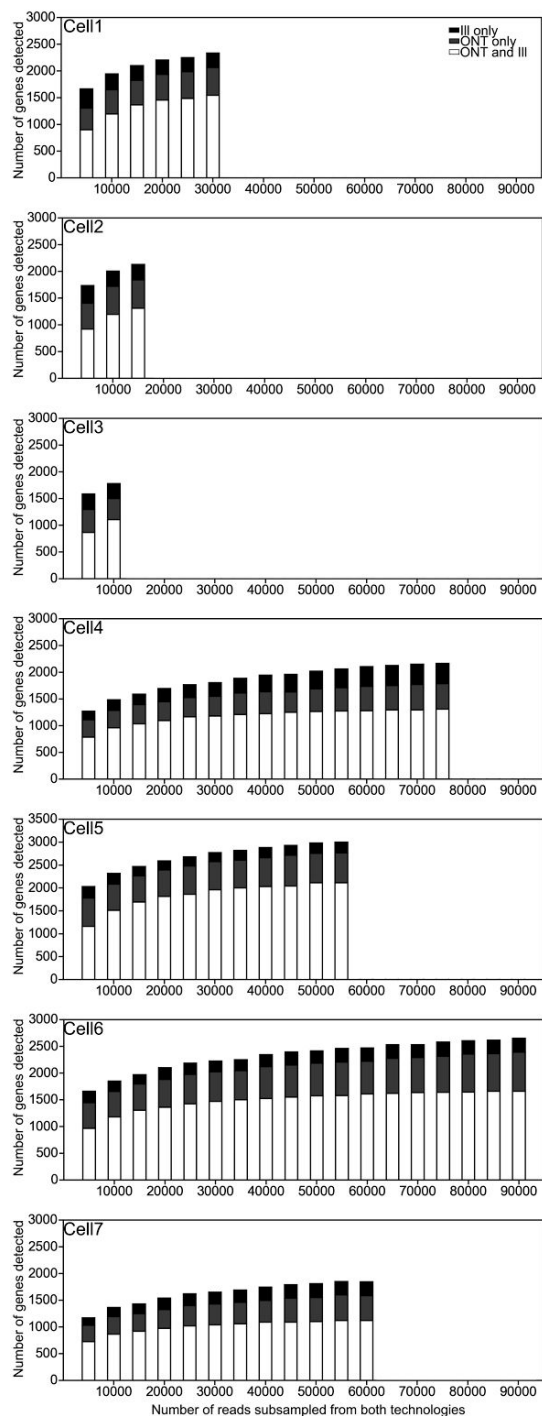

**Supplementary Fig. 2: Gene detection with subsampled data**

For each cell Illumina and ONT reads were subsampled in 5000 read bins until either the total number of Illumina or ONT reads was reached. The subsampled reads were used to quantify gene expression. Genes with a RPG10K value  $>0$ , i.e. with a single mapped read were scored as detected (x-axis = # of genes detected, y-axis= # of reads subsampled). Reads detected in both or either technology are shown in different colored bars.

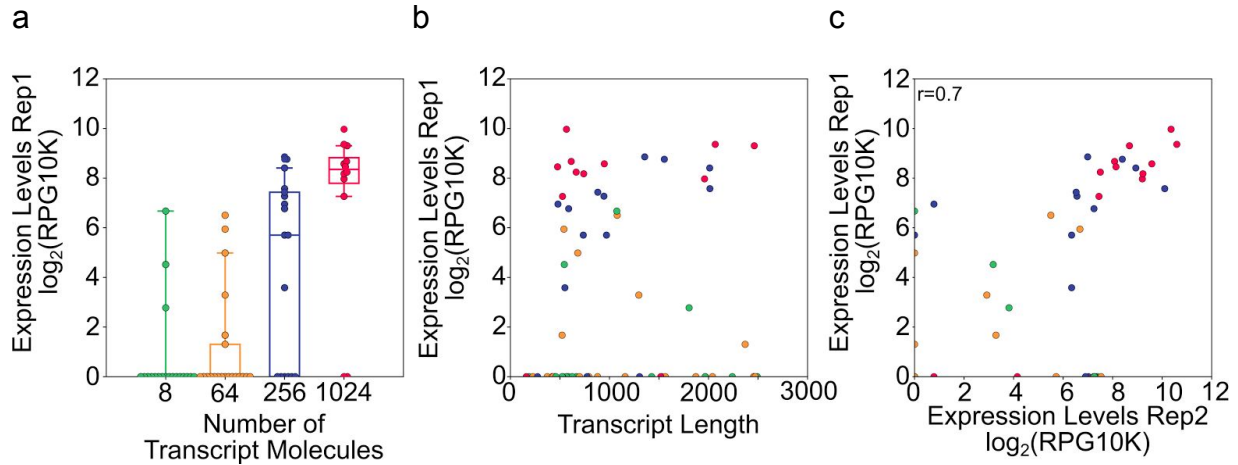

Supplementary Fig. 3: Quantifying SIRV transcripts amplified from 10fg starting material with ONT RNAseq

a) SIRV transcript levels of Replicate 1 (Rep1: 10fg SIRV pool E2) as measured with ONT RNAseq. Transcripts are binned by their starting molecule numbers. b) SIRV transcript levels of Replicate 1 are plotted against transcript length with colors corresponding to groups in a). c) Scatter plot showing correlation of SIRV transcript expression levels of Replicate 1 (Rep1: 10fg SIRV pool E2) and Replicate 2 (Rep2: 10fg SIRV pool E2), both measured by ONT RNAseq. r-value is shown as Pearson-r.

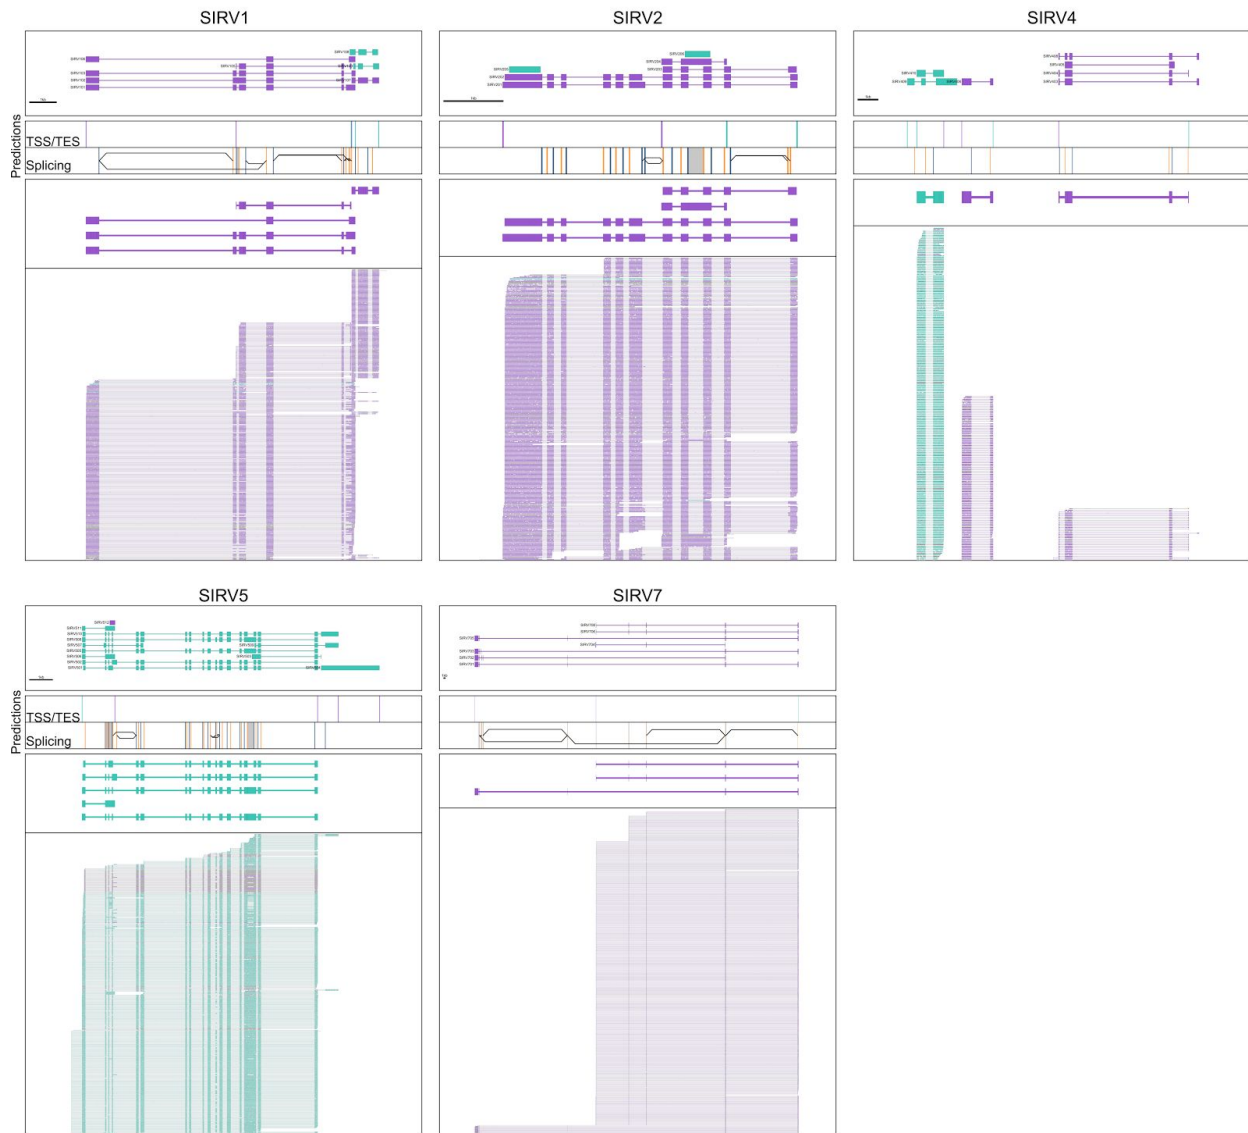

**Supplementary Fig. 4: Identifying Transcript isoforms using ONT RNAseq**

Genome Browser view of indicated SIRV gene loci. Top box contains transcript annotations, second and third box contain TSS (Teal) /TES (Purple) and splice sites (5'SS: yellow, 3'SS: blue) locations predicted from the read data, respectively. Black lines and grey areas in box 3 indicate alternative splicing and intron retention events predicted from the read data. Box 4 contains read alignments of isoform consensus reads. Box 5 contains ONT 2D read alignments. Direction of transcripts, isoform consensus, and ONT 2D reads are indicated by their color (Teal: 5' to 3', Purple: 3' to 5').

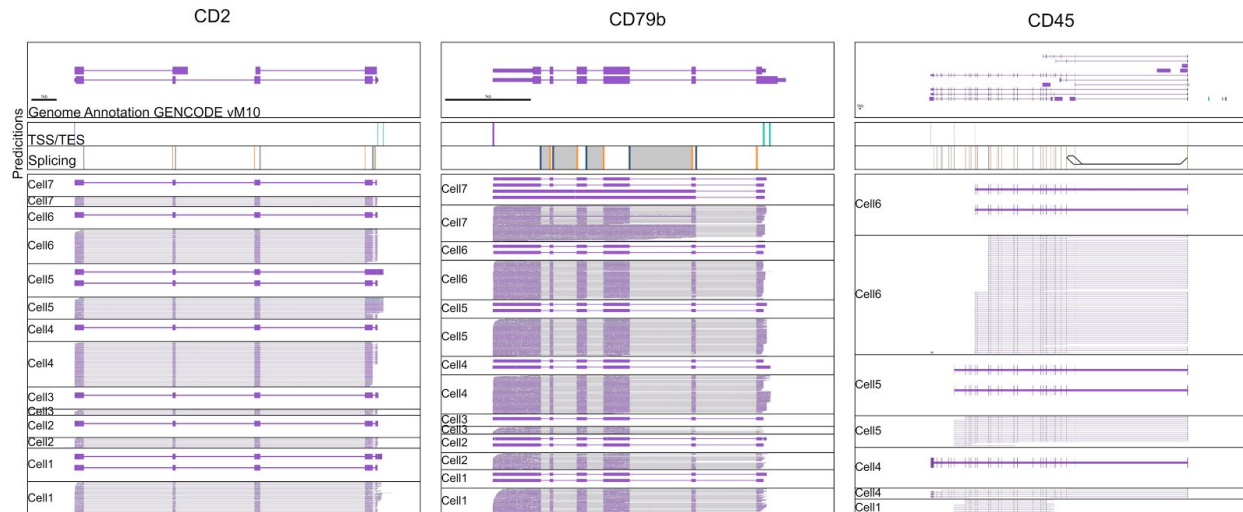

**Supplementary Fig. 5: Diverse Isoforms of B cell surface receptors identified using ONT RNAseq**

Genome Browser view of the indicated B cell surface receptor gene loci. Top box contains transcript annotations, second and third box contain TSS (Teal) /TES (Purple) and splice site (5'SS: yellow, 3'SS: blue) locations predicted, respectively. Black lines and gray areas in box 3 indicate alternative splicing and intron retention events predicted. Below boxes alternatingly contain read alignments of isoform consensus reads and ONT 2D read alignments. Direction of transcripts, isoform consensus, and ONT 2D reads are indicated by their color (Teal: 5' to 3', Purple: 3' to 5').



| Technology | Sample             | Illumina Reads |         | ONT 2D Reads |             |          |                       | Percent of pass alignment filter ONT 2D reads |                                      |                                      |
|------------|--------------------|----------------|---------|--------------|-------------|----------|-----------------------|-----------------------------------------------|--------------------------------------|--------------------------------------|
|            |                    | Raw Reads      | Aligned | Pass Filter  | Fail Filter | Analyzed | Pass Alignment Filter | Complete Reads: Both ISPCR sequences found    | 1 <sup>st</sup> ISPCR sequence found | 2 <sup>nd</sup> ISPCR sequence found |
| R7.3       | Cell1              | 351876         | 321251  | 23957        | 28739       | 52696    | 32556                 | 38.16                                         | 71.71                                | 55.91                                |
| R7.3       | Cell2              | 185258         | 157782  | 8665         | 13396       | 22061    | 13889                 | 36.85                                         | 69.00                                | 57.38                                |
| R7.3       | Cell3              | 109712         | 89998   | 5081         | 12668       | 17749    | 8500                  | 36.27                                         | 67.86                                | 56.29                                |
| R9.4       | Cell4              | 121586         | 94237   | 76721        | 1936        | 76721    | 74604                 | 62.32                                         | 76.51                                | 81.29                                |
| R9.4       | Cell5              | 174128         | 158788  | 53651        | 4223        | 53651    | 52304                 | 66.47                                         | 79.11                                | 84.10                                |
| R9.4       | Cell6              | 97314          | 89572   | 127408       | 1318        | 127408   | 124007                | 66.50                                         | 79.99                                | 83.20                                |
| R9.4       | Cell7              | 73086          | 59738   | 105056       | 2432        | 105056   | 102412                | 64.01                                         | 76.31                                | 83.89                                |
| R9.4       | Lexogen_10fg_Rep1  | --             | --      | 12725        | 368         | 12725    | 10837                 | 68.11                                         | 80.37                                | 84.47                                |
| R9.4       | Lexogen_10fg_Rep2  | --             | --      | 17915        | 412         | 17915    | 15327                 | 70.94                                         | 82.10                                | 86.12                                |
| R9.4       | Lexogen_100fg_Rep1 | --             | --      | 5367         | 526         | 5367     | 4770                  | 66.98                                         | 79.87                                | 83.63                                |
| R9.4       | Lexogen_100fg_Rep2 | --             | --      | 5745         | 528         | 5745     | 5197                  | 65.25                                         | 78.01                                | 83.41                                |

**Supplementary Table 2: Illumina and ONT Read Numbers.**

Illumina Reads: Numbers indicate individual reads, not read pairs. "Aligned" Reads are reads successfully aligned using STAR.

ONT 2D Reads: "Pass Filter" and "Fail Filter" Reads are determined by the Metrichor software based on quality scores.

"Pass Alignment Filter" Reads were aligned using BLAT and more than 60% of their bases aligned to the genome.

Complete reads as mentioned in the manuscript are defined as reads for which both ISPCR sequences could be identified and trimmed.



|                   | Median read count  |      | p-value<br>(MWU one-sided) |
|-------------------|--------------------|------|----------------------------|
| Alternative 5' SS | 81                 | 42.5 | 0.0003                     |
| Alternative 3' SS | 78                 | 33   | 0.0019                     |
| Intron Retention  | 15                 | 10.5 | 0.0412                     |
|                   | yes                | no   |                            |
|                   | Illumina supported |      |                            |

**Supplementary Table 3: Alternative Splice Sites.**

Median ONT 2D read count is shown for alternative splice sites. Splice sites are separated into sites with and without Illumina read support. p-values are calculated using the `scipy.stats.mannwhitneyu` function with keyword argument `alternative='greater'`
