# Supplementary material for: Nanopore long-read RNAseq reveals widespread transcriptional variation among the surface receptors of individual B cells
Source: PubMed Central journal article supplement (PMC5524981; doi:10.1038/ncomms16027), 2017-07-19
Supplement: ncomms16027-s2.pdf [file ncomms16027-s2.pdf]

**Editorial Note:** This manuscript has been previously reviewed at another journal that is not operating a transparent peer review scheme. This document only contains reviewer comments and rebuttal letters for versions considered at Nature Communications.

**REVIEWERS' COMMENTS:**

**Reviewer #1 (Remarks to the Author):**

I'm satisfied with the authors responses to my comments.
